# Supplementary material for: Origin of the Machine Learning Forces Field Errors Across Metal Elements
Source: Research Square preprint supplement (doi:10.21203/rs.3.rs-7716756/v1), 2025-10-27
Supplement: Supplementary file 1 [file 335b4755d5890bc8a1ef6a44.pdf]

# Supplementary Information for: Origin of the Machine Learning Forces Field Errors Across Metal Elements

Xingze Geng<sup>1,2</sup>, Wentao Zhang<sup>3</sup>, Lin-Wang Wang<sup>3\*</sup> & Xiangying Meng<sup>2\*</sup>

<sup>1</sup> College of Sciences, Northeastern University, Shenyang 110819, China

<sup>2</sup> Institute of Materials Intelligent Technology, Liaoning Academy of Materials, Shenyang 110004, China

<sup>3</sup> State Key Laboratory of Optoelectronic Materials and Devices, Institute of Semiconductors, Chinese Academy of Sciences, Beijing 100083, China

\* Correspondence: [lwwang@semi.ac.cn](mailto:lwwang@semi.ac.cn) and [x\\_y\\_meng@mail.neu.edu.cn](mailto:x_y_meng@mail.neu.edu.cn)

## 1. Metal-43 Dataset

Table 1 presents the detailed computational information of the Metal-43 dataset, including the initial structure IDs obtained from the Material Project (MP) database, space group, the PAW pseudopotentials used, and the temperatures at which the AIMD simulations were performed.

Supplementary Table 1: Detailed computational information of the Metal-43 dataset, including the initial structure ID from the Material Project database, spatial groups, PAW pseudopotentials used, and AIMD simulations at 300 K, 0.5 T<sub>c</sub>, T<sub>c</sub>, and 1.2 T<sub>c</sub> temperatures. An empty temperature column indicates that no simulation was conducted at the corresponding temperature.

| Element | mp-id  | Space Group          | 300K | 0.5T <sub>c</sub> | T <sub>c</sub> | 1.2T <sub>c</sub> | POTCAR |
|---------|--------|----------------------|------|-------------------|----------------|-------------------|--------|
| Li      | mp-51  | Fm-3m                | 300  |                   | 454            | 548               | Li_sv  |
| Be      | mp-87  | P6 <sub>3</sub> /mmc | 300  | 780               | 1560           | 1872              | Be_sv  |
| Na      | mp-127 | Im-3m                | 300  |                   | 370            | 444               | Na_pv  |
| Mg      | mp-153 | P6 <sub>3</sub> /mmc | 300  | 462               | 923            | 1108              | Mg_pv  |
| Al      | mp-134 | Fm-3m                | 300  | 467               | 933            | 1120              | Al     |
| K       | mp-58  | Im-3m                | 300  |                   |                | 403               | K_pv   |
| Ca      | mp-45  | Fm-3m                | 300  | 558               | 1115           | 1338              | Ca_sv  |
| Sc      | mp-67  | P6 <sub>3</sub> /mmc | 300  | 907               | 1814           | 2176              | Sc_sv  |
| Ti      | mp-72  | p6 <sub>3</sub> /mmm | 300  | 970               | 1941           | 2297              | Ti_pv  |
| V       | mp-146 | Im-3m                | 300  | 1092              | 2183           | 2620              | V_pv   |
| Cr      | mp-90  | Im-3m                | 300  | 1090              | 2180           | 2616              | Cr_pv  |

|    |          |          |     |      |      |      |       |
|----|----------|----------|-----|------|------|------|-------|
| Mn | mp-35    | I4-3m    | 300 | 760  | 1519 | 1823 | Mn_pv |
| Fe | mp-13    | Im-3m    | 300 | 906  | 1811 | 2173 | Fe    |
| Co | mp-54    | P6_3/mmc | 300 | 884  | 1768 | 2122 | Co    |
| Ni | mp-23    | Fm-3m    | 300 | 864  | 1728 | 2138 | Ni    |
| Cu | mp-30    | Fm-3m    | 300 | 678  | 1358 | 1630 | Cu_pv |
| Zn | mp-79    | P6_3/mmc | 300 |      | 693  | 832  | Zn    |
| Ga | mp-142   | Cmce     | 300 |      |      | 364  | Ga    |
| Rb |          | Im-3m    | 300 |      |      | 374  | Rb_pv |
| Sr | mp-76    | Fm-3m    | 300 | 525  | 1050 | 1260 | Sr_sv |
| Y  | mp-112   | P6_3/mmc | 300 | 900  | 1799 | 2159 | Y_sv  |
| Zr | mp-131   | P6_3/mmc | 300 | 1065 | 2128 | 2554 | Zr_sv |
| Nb | mp-75    | Im-3m    | 300 | 1375 | 2750 | 3300 | Nb_sv |
| Mo | mp-129   | Im-3m    | 300 | 1448 | 2896 | 3475 | Mo_pv |
| Tc | mp-113   | P6_3/mmc | 300 | 1215 | 2430 | 2916 | Tc_pv |
| Ru | mp-33    | P6_3/mmc | 300 | 1304 | 2607 | 3218 | Ru_pv |
| Rh | mp-74    | Fm-3m    | 300 | 1119 | 2237 | 2684 | Rh_pv |
| Pd | mp-2     | Fm-3m    | 300 | 914  | 1828 | 2194 | Pd    |
| Ag | mp-124   | Fm-3m    | 300 | 618  | 1235 | 1482 | Ag    |
| Cd | mp-94    | P6_3/mmc | 300 |      | 594  | 713  | Cd    |
| In | mp-85    | Fm-3m    | 300 |      | 430  | 516  | In    |
| Cs | mp-1     | Im-3m    | 300 |      |      | 362  | Cs_sv |
| Ba | mp-122   | Im-3m    | 300 | 500  | 1000 | 1200 | Ba_sv |
| Hf | mp-103   | P6_3/mmc | 300 | 1253 | 2506 | 3007 | Hf_pv |
| Ta | mp-50    | Im-3m    | 300 | 1645 | 3290 | 3948 | Ta_pv |
| W  | MP-91    | Im-3m    | 300 | 1848 | 3695 | 4434 | W_sv  |
| Re | mp-8     | P6_3/mmc | 300 | 1730 | 3459 | 4151 | Re    |
| Os | mp-49    | P6_3/mmc | 300 | 1653 | 3306 | 3967 | Os_pv |
| Ir | mp-101   | Fm-3m    | 300 | 1370 | 2739 | 3287 | It    |
| Pt | mp-126   | Fm-3m    | 300 | 1020 | 2041 | 2449 | Pt    |
| Au | mp-81    | Fm-3m    | 300 | 669  | 1337 | 1606 | Au    |
| Hg | mp-10861 | P6/mmm   | 300 |      |      |      | Hg    |
| Tl | mp-82    | P6_3/mmc | 300 |      | 577  | 692  | Tl    |

## 2. Hyperparameters of NEP and DeePMD models

Unless otherwise specified, the MLFF models for the elements in this work adopt a uniform hyperparameters setting. Tables 2 and 3 summarize the main hyperparameters of the NEP and DeePMD models, including the cutoff radius, neural network architecture, and the number of training iterations.

Supplementary Table 2: DeePMD model hyperparameters

| Parameter              | Value       |
|------------------------|-------------|
| neighbor               | 100         |
| cutoff                 | 6.0         |
| dtype                  | float64     |
| R_max                  | 6.0         |
| R_min                  | 0.5         |
| smooth_fun             | poly2_r     |
| embedding network size | 25,50,100   |
| fitting_network size   | 200,200,200 |
| activate_function      | tanh        |
| optimizer              | Adam        |
| start_energy_weight    | 100.0       |
| limit_energy_weight    | 10.0        |
| start_force_weight     | 100.0       |
| limit_force_weight     | 10.0        |
| epoch                  | 50          |
| start_lr               | 0.01        |
| limit_lr               | $10^{-7}$   |

Supplementary Table 3: NEP model hyperparameters

| Parameter | Value |
|-----------|-------|
| cutoff    | 6,4   |
| n_max     | 4, 4  |

|            |        |
|------------|--------|
| basis_size | 8,8    |
| l_max      | 4,2,0  |
| neuron     | 50     |
| lambda_e   | 1.0    |
| lambda_f   | 1.0    |
| population | 50     |
| generation | 100000 |

### 3. Errors of different MLFF models

To further demonstrate that these errors originate from the intrinsic properties of elements rather than specific models or architectures, we also conducted tests on two General-Purpose large models. These models designed to cover a broader range of elements, featuring enhanced generalization capability and model size with parameter counts reaching the million scale. Representative examples of this category include the Higher Order Equivariant Message Passing Neural Networks (MACE)<sup>1,2</sup> and ORB<sup>3</sup>.

Unlike the smaller models primarily used in this study (NEP and DeePMD), both MACE and ORB are pre-trained general-purpose models. Therefore, we directly employed the publicly released models for testing. Specifically, the MACE model used in this study is the large model trained on the Materials Project Relaxation Trajectory (MPTrj) dataset<sup>4</sup>, while ORB used its latest version V3 model. Meanwhile, it is worth noting that due to differences in the DFT parameter settings between the datasets used for training the General-Purpose models and the dataset constructed in this study, there is an energy reference offset. Therefore, a constant energy shift was applied to the predicted energies during testing. Specifically, for each element, the shift was defined as the average difference between the model-predicted energies and the reference DFT energies for the corresponding test system. Given that practical applications typically focus on relative differences rather than absolute energy, such a correction is both reasonable and commonly adopted in model evaluation.

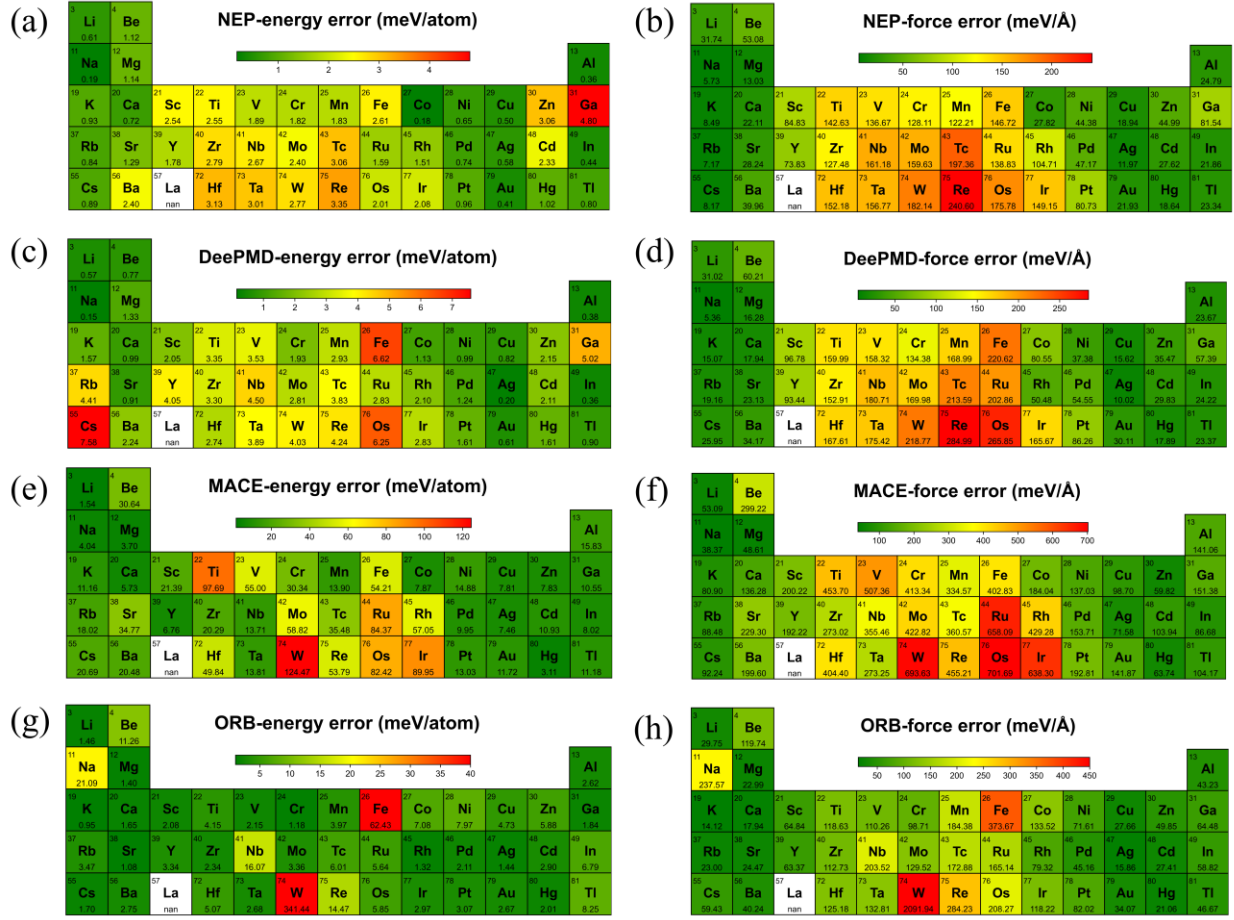

Supplementary Figure 1: Energy and force errors of four machine learning force fields (NEP, DeePMD, MACE, and Orb) across 43 metallic elements, presented in the form of the periodic table.

Figure 1 presents the energy and force errors of the four machine learning force fields, NEP, DeePMD, mace, and ORB, in the form of a periodic table of elements respectively. Figure. 2 (c) and (b) further compares the energy and force errors of the four MLFF models across different metallic systems. Among them, the MACE model exhibits slightly weaker overall performance, whereas the ORB model has approached the accuracy of small models (NEP and DeePMD) that undergo separate fitting optimization. Nevertheless, it can be seen that, regardless of the model, the error distribution trends across different metals are highly consistent, indicating that the distribution pattern of errors on the periodic table of elements has a certain universality and reflects the influence of the intrinsic properties of elements on fitting difficulty.

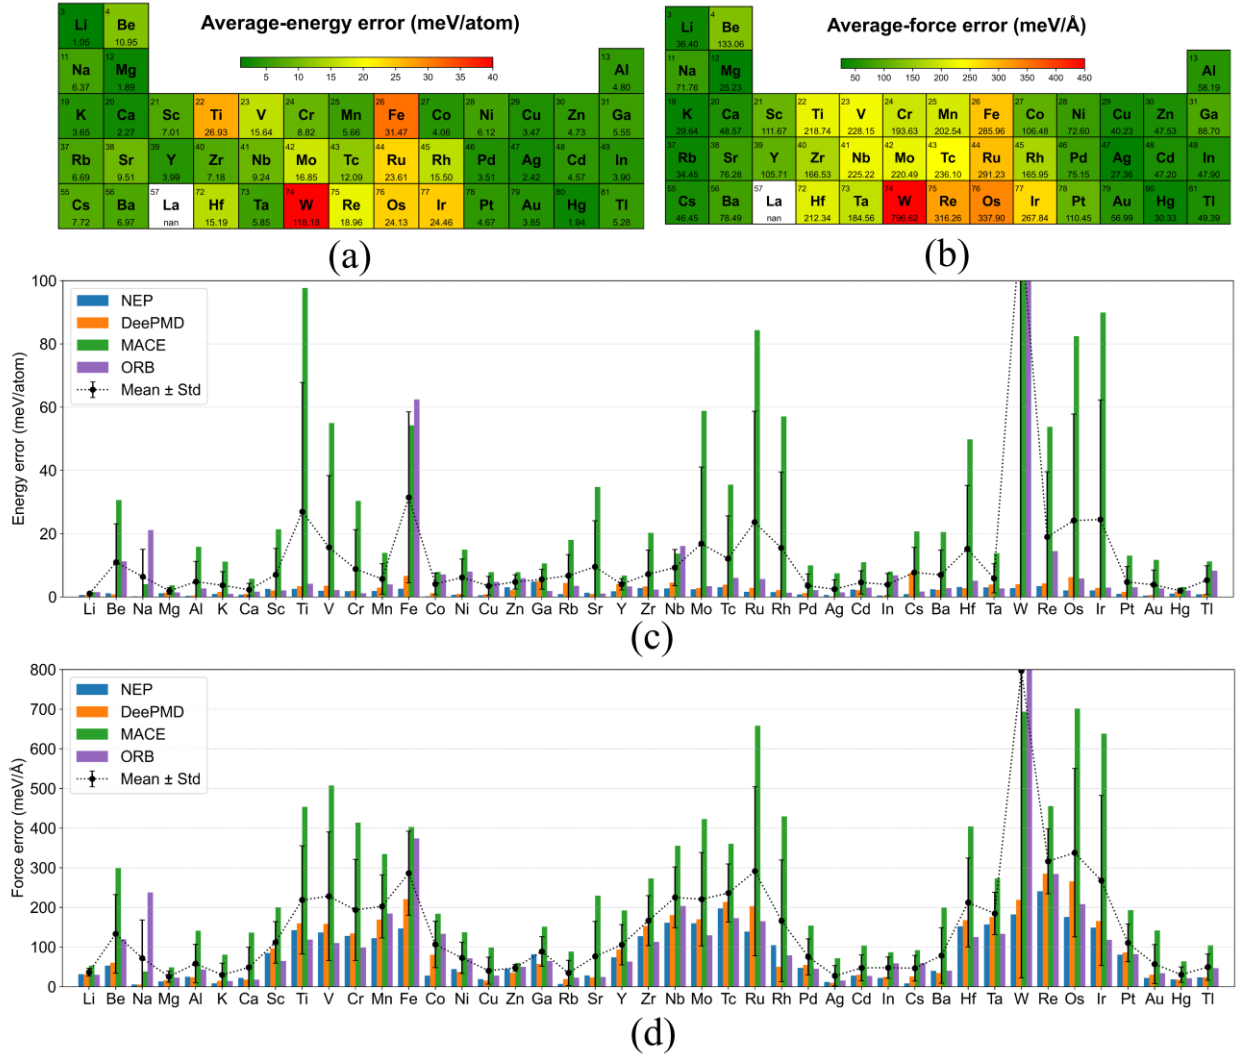

Supplementary Figure 2: **(a, b)** Average energy and force errors of NEP, DeePMD, MACE, and ORB models across 43 metallic elements, presented in the form of the periodic table. **(c, d)** Histogram of energy and force error distributions for four models across different elemental systems, with mean values and standard deviations indicated.

#### 4. Variation of the Sum of Eigenvalues below the Fermi level under Different Condition

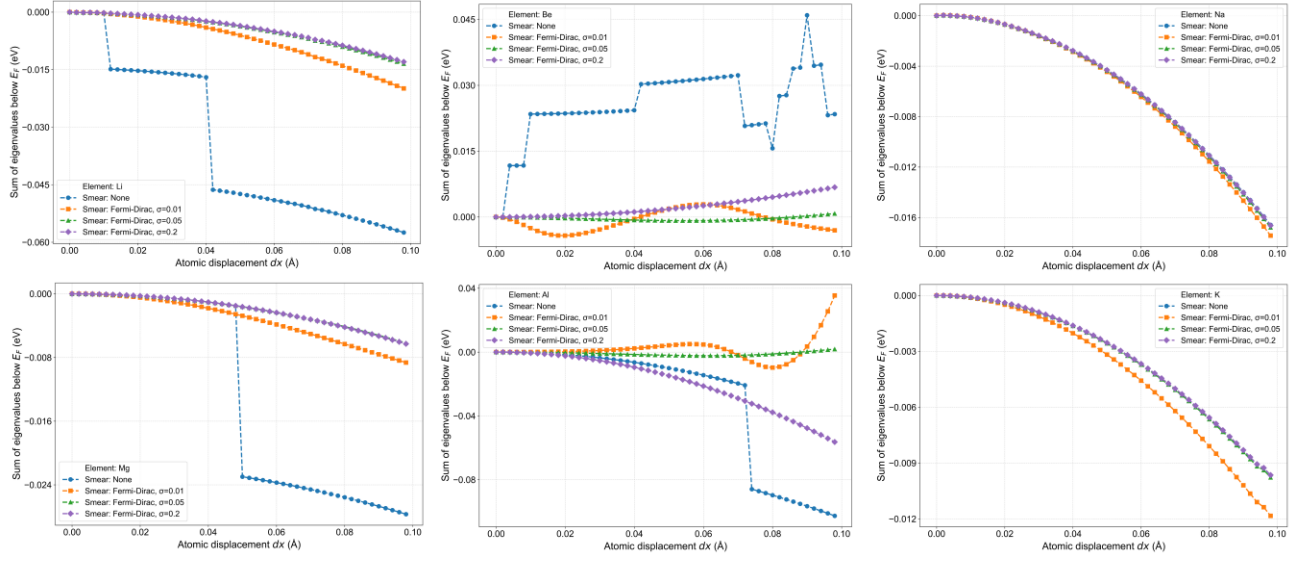

Supplementary Figure 3: Variation of the sum of eigenvalues below the Fermi level under atomic displacement perturbations for elements Li, Be, Na, Mg, Al, and K. Different curves represent various smearing methods applied.

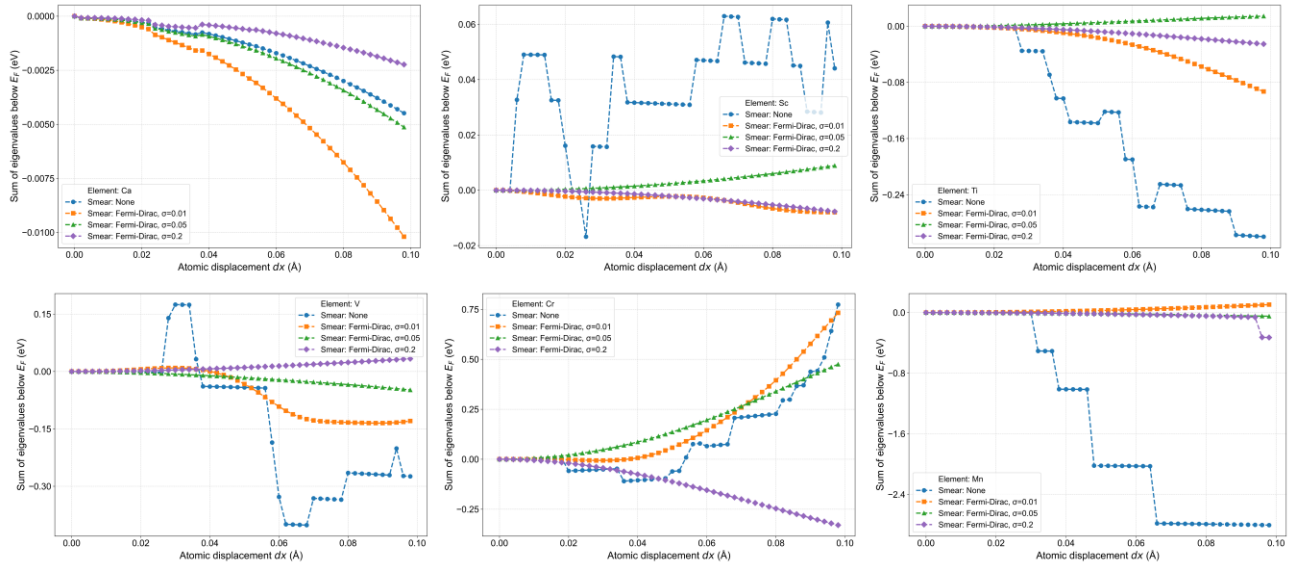

Supplementary Figure 4: Variation of the sum of eigenvalues below the Fermi level under atomic displacement perturbations for elements Ca, Sc, Ti, V, Cr, and Mn. Different curves represent various smearing methods applied.

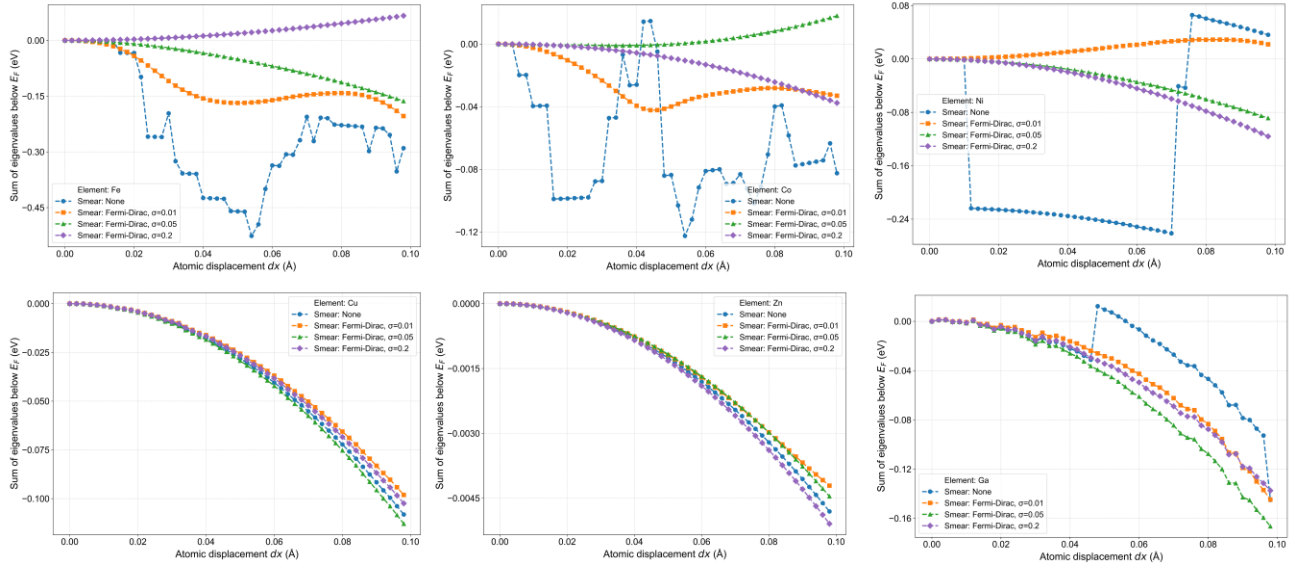

Supplementary Figure 5: Variation of the sum of eigenvalues below the Fermi level under atomic displacement perturbations for elements Fe, Co, Ni, Cu, Zn and Ga. Different curves represent various smearing methods applied.

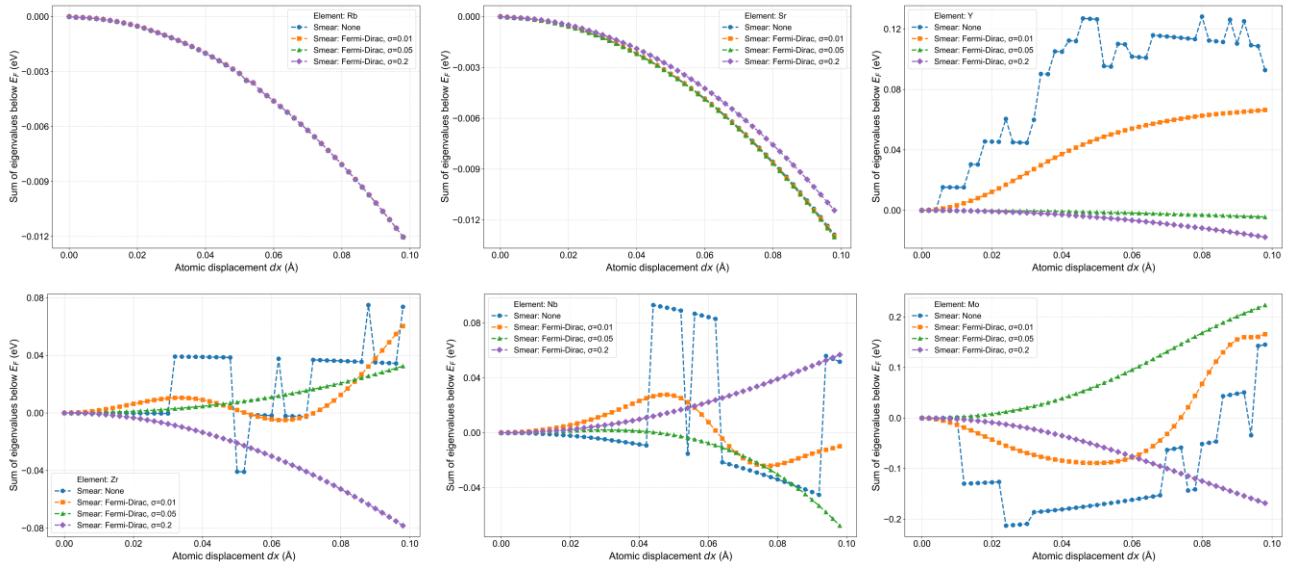

Supplementary Figure 6: Variation of the sum of eigenvalues below the Fermi level under atomic displacement perturbations for elements Rb, Sr, Y, Zr, Nb, and Mo. Different curves represent various smearing methods applied.



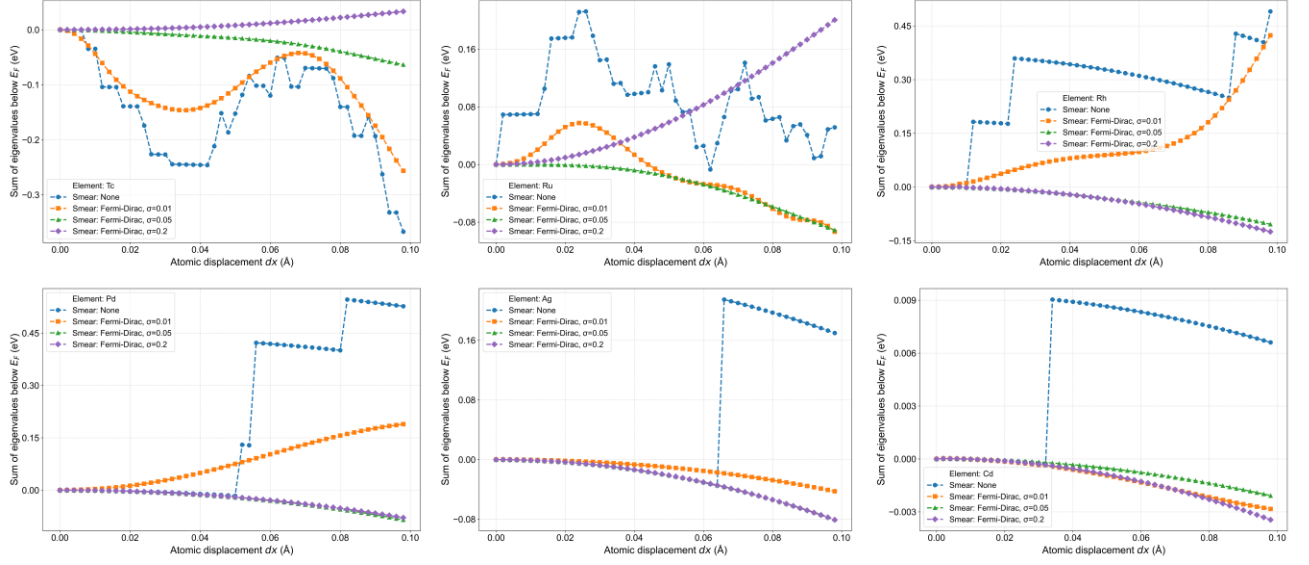

Supplementary Figure 7: Variation of the sum of eigenvalues below the Fermi level under atomic displacement perturbations for elements Tc, Ru, Rh, Pd, Ag, and Cd. Different curves represent various smearing methods applied.

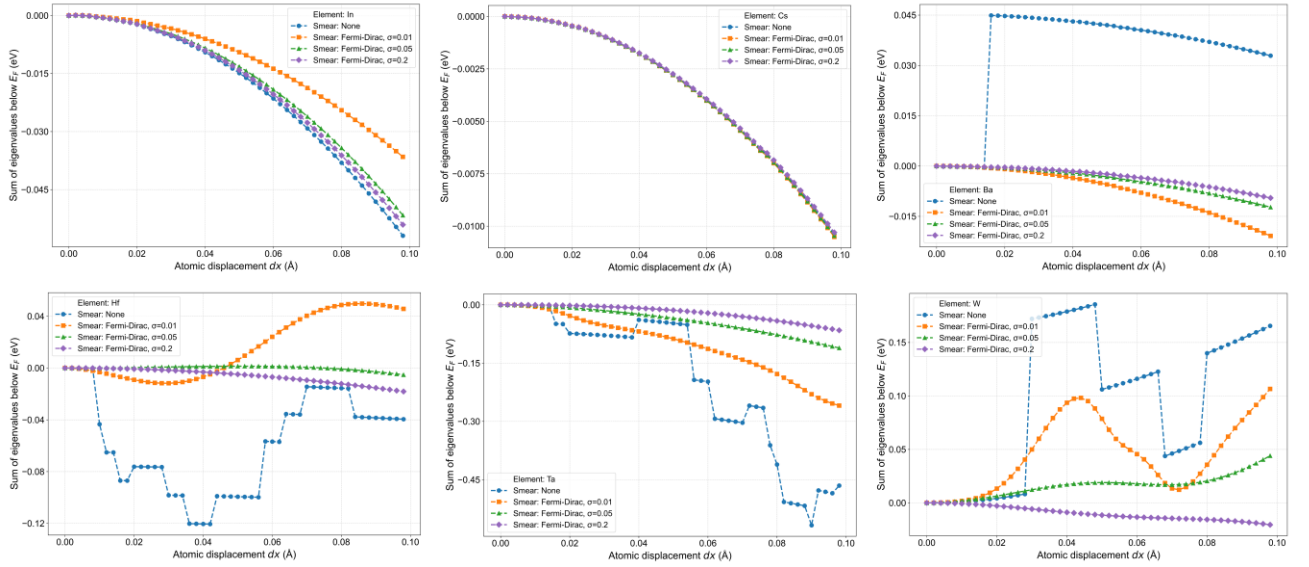

Supplementary Figure 8: Variation of the sum of eigenvalues below the Fermi level under atomic displacement perturbations for elements In, Cs, Ba, Hf, Ta, and W. Different curves represent various smearing methods applied.

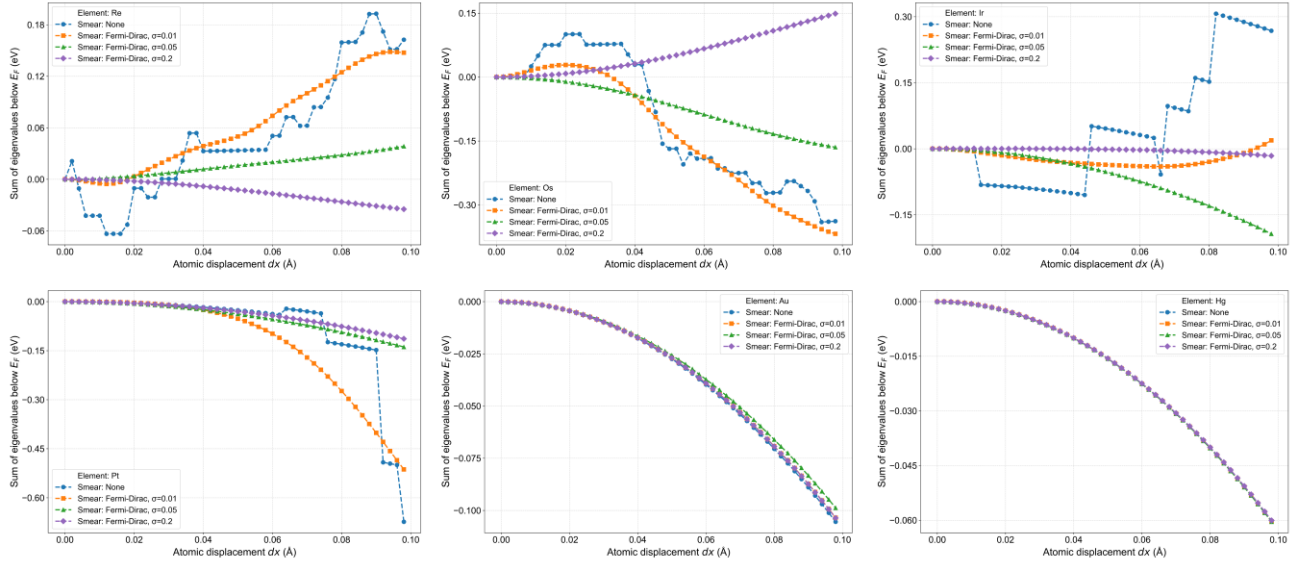

Supplementary Figure 9: Variation of the sum of eigenvalues below the Fermi level under atomic displacement perturbations for elements Re, Os, Ir, Pt, Au, and Hg. Different curves represent various smearing methods applied.

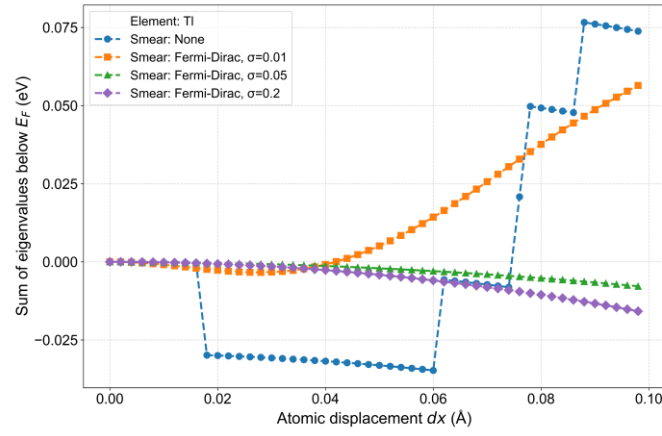

Supplementary Figure 10: Variation of the sum of eigenvalues below the Fermi level under atomic displacement perturbations for elements Tl. Different curves represent various smearing methods applied.

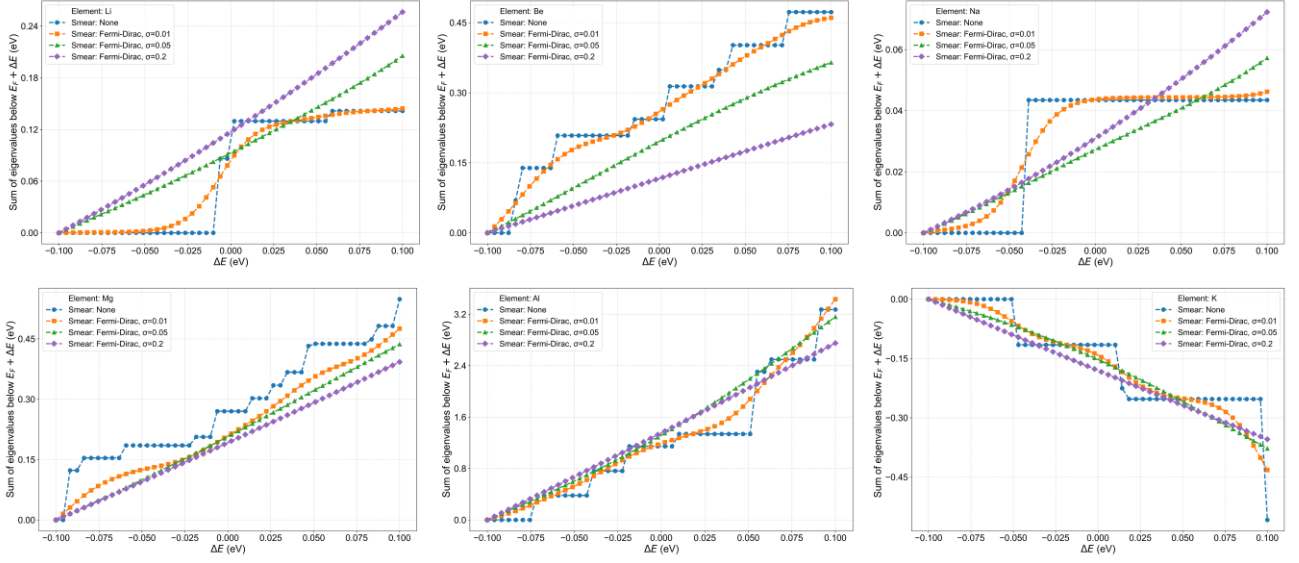

Supplementary Figure 11: Variation of the sum of eigenvalues below the Fermi level under Fermi level shifts for elements Li, Be, Na, Mg, Al, and K. Different curves represent various smearing methods applied.

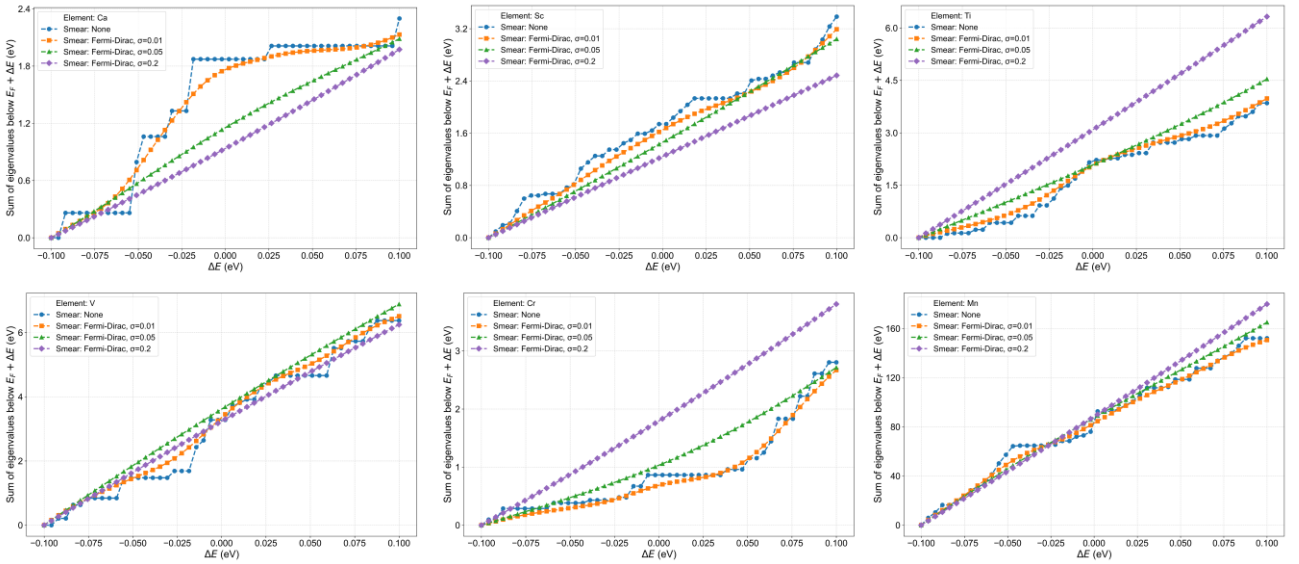

Supplementary Figure 12: Variation of the sum of eigenvalues below the Fermi level under Fermi level shifts for elements Ca, Sc, Ti, V, Cr, and Mn. Different curves represent various smearing methods applied.

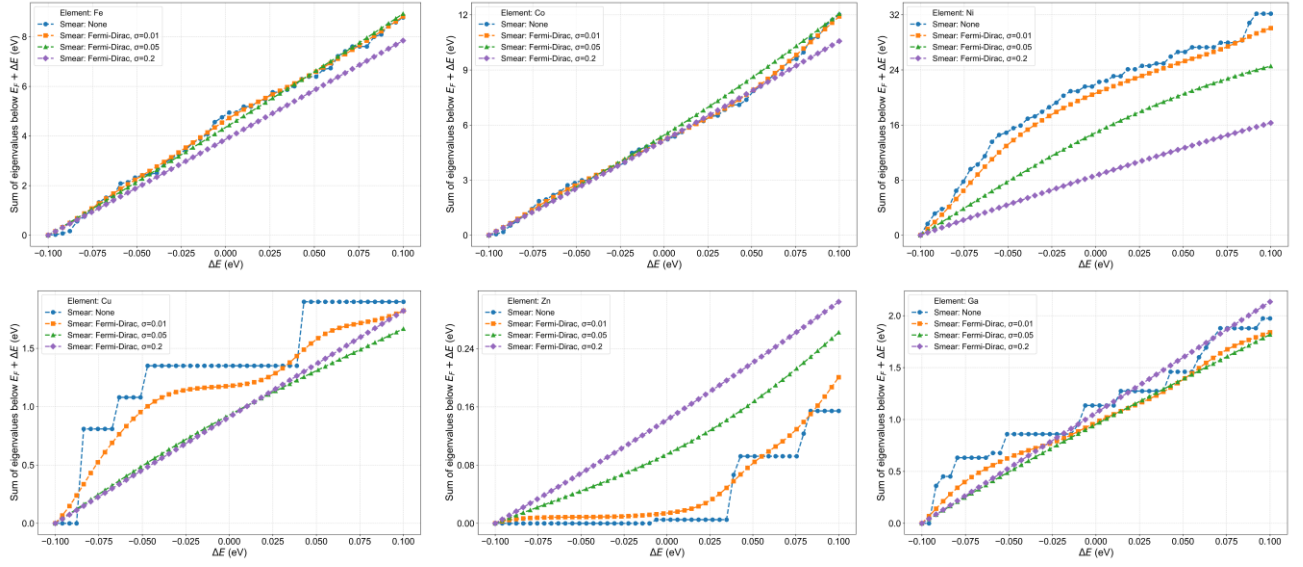

Supplementary Figure 13: Variation of the sum of eigenvalues below the Fermi level under Fermi level shifts for elements Fe, Co, Ni, Cu, Zn, and Ga. Different curves represent various smearing methods applied.

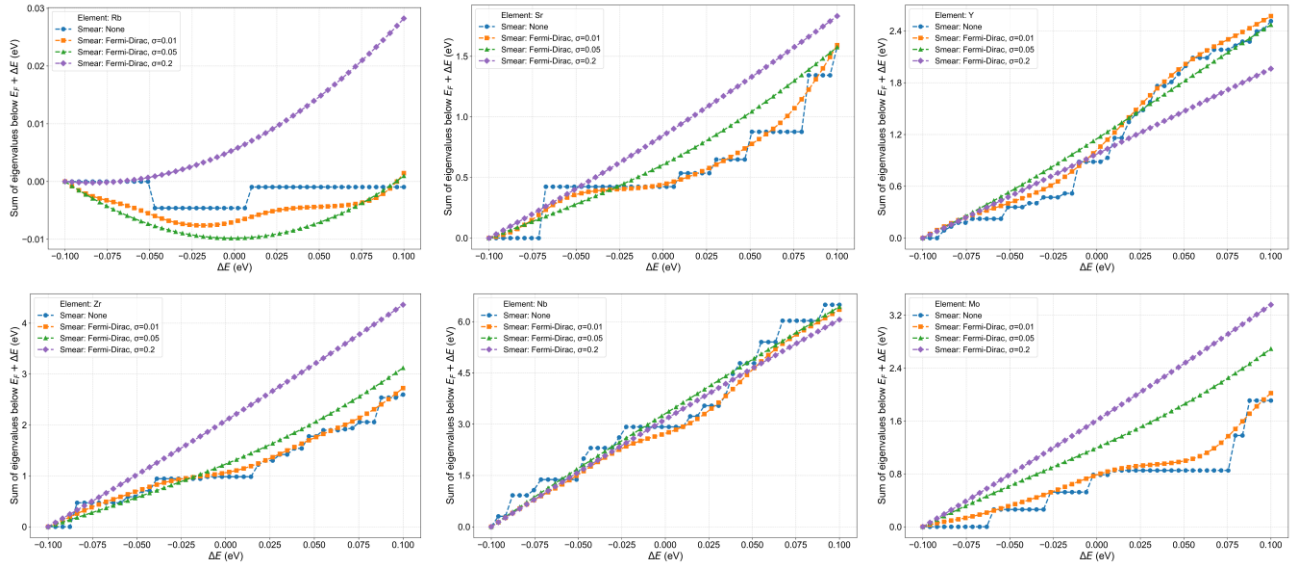

Supplementary Figure 14: Variation of the sum of eigenvalues below the Fermi level under Fermi level shifts for elements Rb, Sr, Y, Zr, Nb, and Mo. Different curves represent various smearing methods applied.

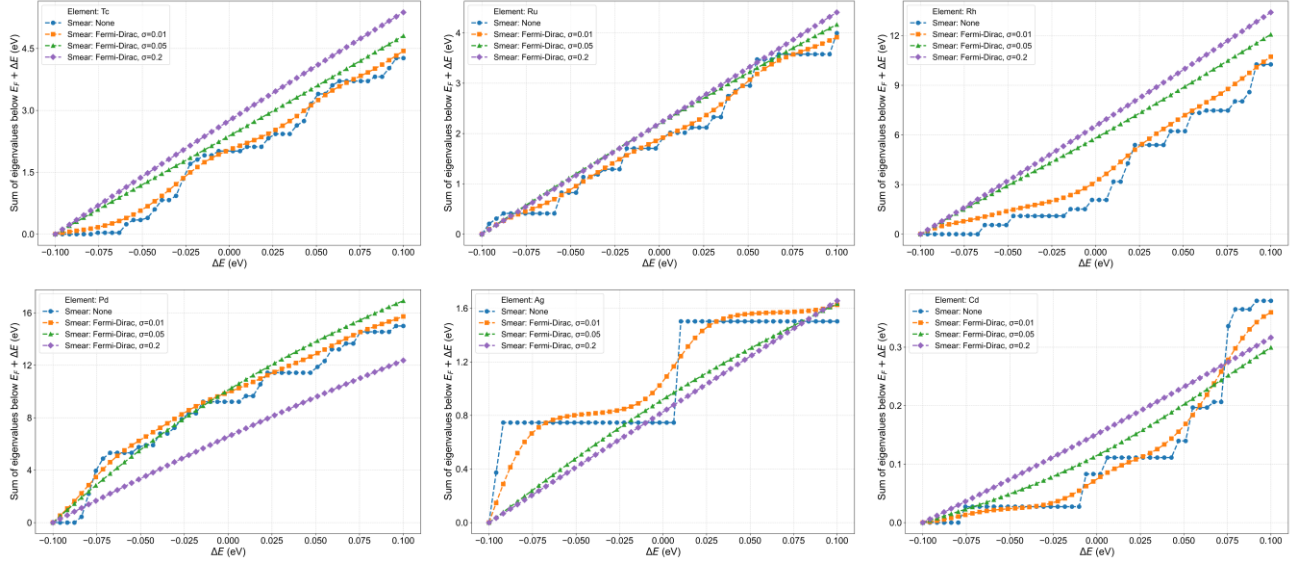

Supplementary Figure 15: Variation of the sum of eigenvalues below the Fermi level under Fermi level shifts for elements Tc, Ru, Rh, Pd, Ag, and Cd. Different curves represent various smearing methods applied.

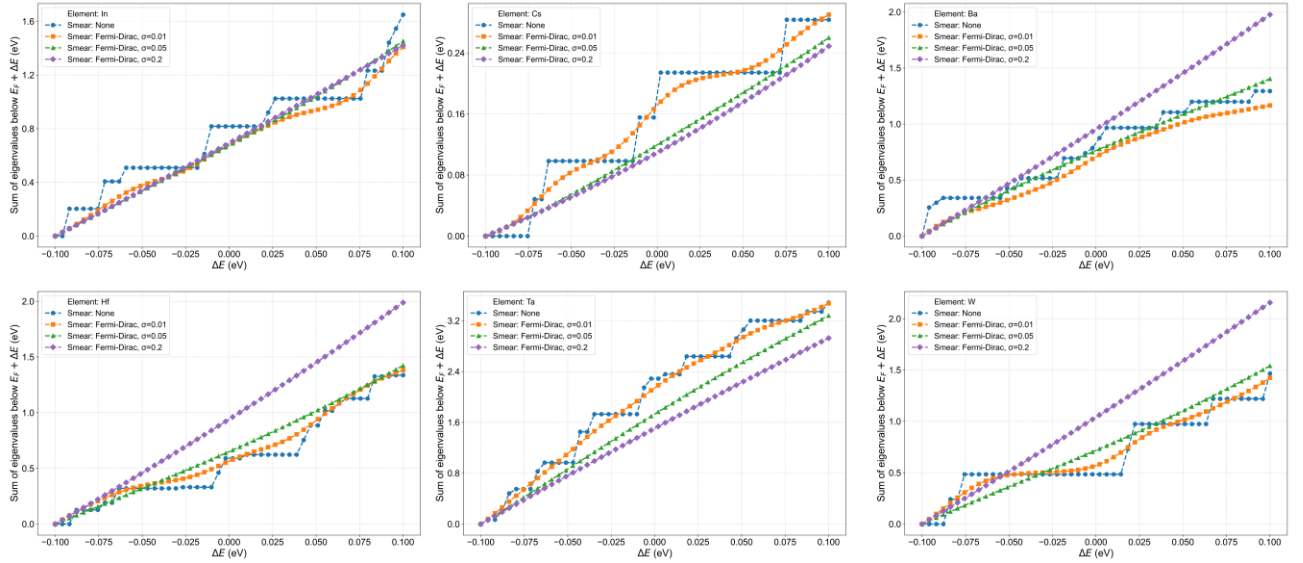

Supplementary Figure 16: Variation of the sum of eigenvalues below the Fermi level under Fermi level shifts for elements In, Cs, Ba, Hf, Ta, and W. Different curves represent various smearing methods applied.

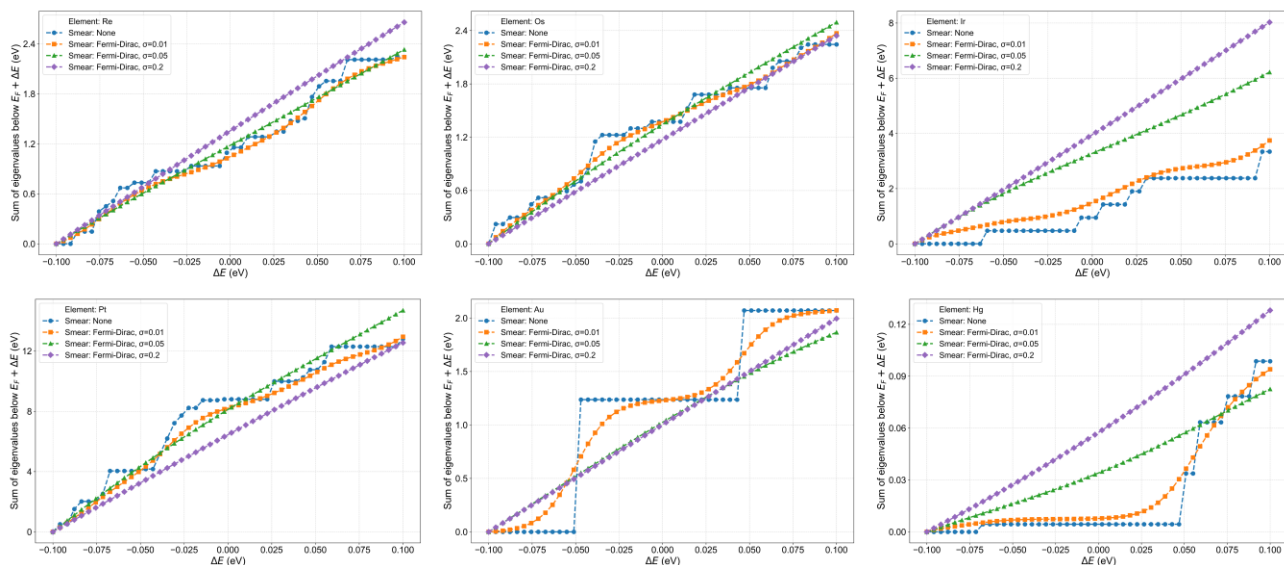

Supplementary Figure 17: Variation of the sum of eigenvalues below the Fermi level under Fermi level shifts for elements Re, Os, Ir, Pt, Au, and Hg. Different curves represent various smearing methods applied.

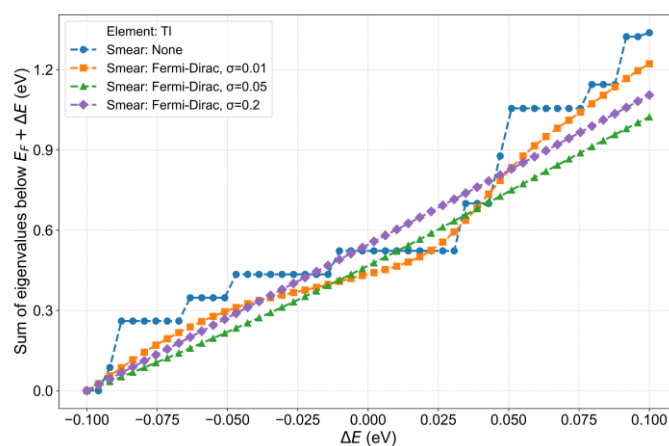

Supplementary Figure 18: Variation of the sum of eigenvalues below the Fermi level under Fermi level shifts for elements Tl. Different curves represent various smearing methods applied.

## Reference

1. Batatia, I., Kovács, D. P., Simm, G. N. C., Ortner, C. & Csányi, G. MACE: Higher Order Equivariant Message Passing Neural Networks for Fast and Accurate Force Fields. Preprint at <https://doi.org/10.48550/arXiv.2206.07697> (2023).
2. Batatia, I. The design space of E(3)-equivariant atom-centred interatomic potentials.

3. Neumann, M. *et al.* Orb: A Fast, Scalable Neural Network Potential. Preprint at <https://doi.org/10.48550/arXiv.2410.22570> (2024).
4. Jain, A. *et al.* Commentary: The Materials Project: A materials genome approach to accelerating materials innovation. *APL Mater.* **1**, 011002 (2013).
